# Supplementary material for: Harnessing the power of thermosensitive liposomes with gold nanoprisms and silica for controlled drug delivery in combined chemotherapy and phototherapy
Source: Royal Society of Chemistry journal article supplement (doi:10.1039/d4ra03359k), 2024-01-01
Supplement: d4ra03359k1.pdf [file d4ra03359k1.pdf]

## Supporting Information

### **Harnessing the Power of Thermosensitive Liposomes with Gold Nanoprisms and Silica for Controlled Drug Delivery in Combined Chemotherapy and Phototherapy**

Marta Rubio-Camacho,<sup>\*a</sup> Carlos Cuestas-Ayllón,<sup>b</sup> Beatriz Torres-Herrero,<sup>b</sup> María José Martínez-Tomé,<sup>a</sup> Jesus M. de la Fuente<sup>b</sup> and C. Reyes Mateo<sup>a</sup>

<sup>a</sup>Instituto de Investigación, Desarrollo e Innovación en Biotecnología Sanitaria de Elche (IDiBE), Universidad Miguel Hernández (UMH), c/ Avenida de la Universidad de Elche, s/n, 03202 Elche, Alicante, Spain

<sup>b</sup>Instituto de Nanociencia y Ciencia de Materiales de Aragón, CSIC-Universidad de Zaragoza, c/ Pedro Cerbuna s/n, 50009 Zaragoza, Spain & CIBER-BBN

Correspondence: Marta Rubio-Camacho

Instituto de Investigación, Desarrollo e Innovación en Biotecnología Sanitaria de Elche (IDiBE), Universidad Miguel Hernández (UMH), c/ Avenida de la Universidad de Elche, s/n, 03202 Elche, Alicante, Spain

Tel: +34 965 222479

Email: marta.rubioc@umh.es

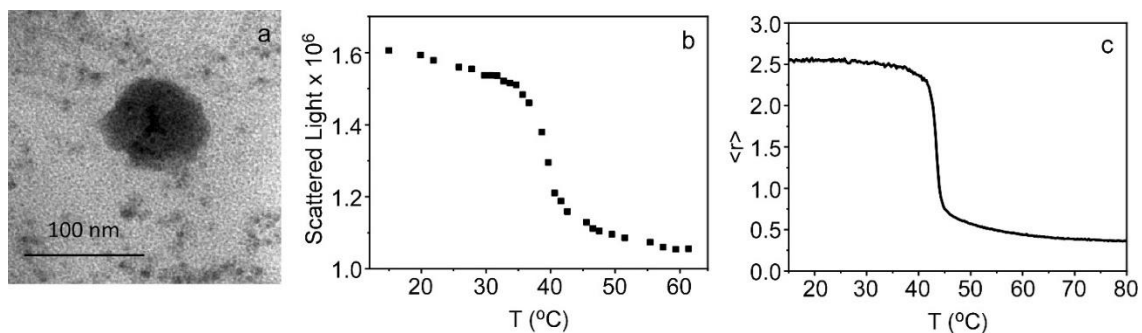

**Fig. S1.** (a) Transmission electron microscopy (TEM) image of TSLs composed of DPPC, effect of temperature on (b) the scattered light and on (c) the fluorescence anisotropy of TSLs.

**Table S1.** Photothermal effect (temperature increase,  $\Delta T$ ) of the different nanostructures fabricated irradiating at a laser power of 1.5 W for 60 seconds.

| SAMPLE          | H <sub>2</sub> O | TSLs          | NPRs           | AuNPRs covalently bound to TSLs | <sup>†</sup> AuNPRs and TSLs coencapsulated in BioSi@NPs |
|-----------------|------------------|---------------|----------------|---------------------------------|----------------------------------------------------------|
| $\Delta T$ (°C) | $3.9 \pm 0.9$    | $9.0 \pm 0.7$ | $59.3 \pm 1.9$ | $52.5 \pm 1.3$                  | $20.1 \pm 3.4$                                           |

<sup>†</sup> The actual temperature reached inside the structure of the BioSi@NPs after irradiation could not be determined, we only determined the temperature in the solution.
